# Supplementary material
Source: PubMed Central journal article supplement (PMC3392883)
Supplement: gmb-35-1-sup-315-suppl1.pdf [file gmb-35-1-sup-315-suppl1.pdf]

**Table S1** - Identified candidates among abiotic stress responsive gene categories in soybean and *Medicago* genomes based on selected arabidopsis seed sequences, as well as number of other hits, e-value and score, against the respective database of *Medicago truncatula* (Mt) and *Glycine max* (Gm).

| Arabidopsis Information                        |                  | Blast Result            |                      |            |            |       |
|------------------------------------------------|------------------|-------------------------|----------------------|------------|------------|-------|
| Category                                       | Query Sequence   | Best Hit                | Organism             | Other Hits | E-value    | Score |
| bZIP Transcription Factor                      | At1g42990        | Mt_bZIP_1               | <i>M. truncatula</i> | 2          | 7,00 e-12  | 67.4  |
|                                                | At3g10740        | Mt_Carb_Met_1           | <i>M. truncatula</i> | 7          | 0.0        | 959   |
|                                                |                  | Gm_Carb_Met_1           | <i>G. max</i>        | 8          | 0.0        | 947   |
| Carbohydrate Metabolism                        | At3g06500        | Gm_Carb_Met_2           | <i>G. max</i>        | 7          | 6,00 e-121 | 430   |
|                                                |                  | Mt_Carb_Met_2           | <i>M. truncatula</i> | 6          | 0.0        | 788   |
|                                                | At3g60130        | Gm_Carb_Met_3           | <i>G. max</i>        | 2          | 8,00 e-76  | 280   |
|                                                |                  | Mt_Carb_Met_3           | <i>M. truncatula</i> | 5          | 1,00 e-107 | 386   |
|                                                | At5g18670        | Gm_Carb_Met_4           | <i>G. max</i>        | 3          | 1,00 e-166 | 582   |
|                                                |                  | Mt_Carb_Met_4           | <i>M. truncatula</i> | 3          | 8,00 e-141 | 496   |
|                                                | At3g04240        | Gm_Carb_Met_5           | <i>G. max</i>        | 19         | 0.0        | 919   |
|                                                |                  | Mt_Carb_Met_5           | <i>M. truncatula</i> | 17         | 0.0        | 1166  |
|                                                | At2g43820        | Gm_Carb_Met_6           | <i>G. max</i>        | 5          | 5,00 e-98  | 353   |
|                                                |                  | Mt_Carb_Met_6           | <i>M. truncatula</i> | 10         | 2,00 e-106 | 382   |
|                                                | At3g53180        | Gm_Cell_Met_1           | <i>G. max</i>        | 1          | 8,00 e-83  | 304   |
|                                                |                  | Mt_Cell_Met_1           | <i>M. truncatula</i> | 7          | 9,00 e-175 | 610   |
| At3g45300                                      | Gm_Cell_Met_2    | <i>G. max</i>           | 4                    | 2,00 e-60  | 229        |       |
|                                                | Mt_Cell_Met_2    | <i>M. truncatula</i>    | 7                    | 6,00 e-153 | 536        |       |
| Cellular Metabolism                            | At2g39210        | Gm_Cell_Met_3           | <i>G. max</i>        | 14         | 2,00 e-156 | 352   |
|                                                |                  | Mt_Cell_Met_3           | <i>M. truncatula</i> | 8          | 1,00 e-91  | 333   |
|                                                | At2g42970        | Gm_Cell_Met_4           | <i>G. max</i>        | 2          | 3,00 e-91  | 331   |
|                                                |                  | Mt_Cell_Met_4           | <i>M. truncatula</i> | 11         | 7,00 e-145 | 510   |
|                                                | At1g68620        | Gm_Cell_Met_5           | <i>G. max</i>        | 19         | 1,00 e-38  | 155   |
| Cellular Structure Organization and Biogenesis | At1g03220        | Mt_Cell_Met_5           | <i>M. truncatula</i> | 19         | 7,00 e-40  | 159   |
|                                                |                  | Gm_Cell_Stru_Org_Biog_1 | <i>G. max</i>        | 16         | 4,00 e-110 | 394   |
|                                                | At3g10720        | Mt_Cell_Stru_Org_Biog_1 | <i>M. truncatula</i> | 19         | 4,00 e-145 | 510   |
|                                                |                  | Gm_Cell_Stru_Org_Biog_2 | <i>G. max</i>        | 7          | 1,00 e-123 | 437   |
|                                                | At5g62350        | Mt_Cell_Stru_Org_Biog_2 | <i>M. truncatula</i> | 7          | 1,00 e-87  | 318   |
|                                                |                  | Gm_Cell_Stru_Org_Biog_3 | <i>G. max</i>        | 16         | 1,00 e-47  | 184   |
|                                                | At5g20230        | Mt_Cell_Stru_Org_Biog_3 | <i>M. truncatula</i> | 18         | 9,00 e-47  | 182   |
|                                                |                  | Gm_Cell_Stru_Org_Biog_4 | <i>G. max</i>        | 19         | 7,00 e-21  | 95.9  |
|                                                | At2g34500        | Mt_Cell_Stru_Org_Biog_4 | <i>M. truncatula</i> | 18         | 1,00 e-22  | 102   |
|                                                |                  | Gm_Cytoch_P450_1        | <i>G. max</i>        | 11         | 2,00 e-101 | 365   |
| Cytochrome P450                                | At3g26220        | Mt_Cytoch_P450_1        | <i>M. truncatula</i> | 12         | 0.0        | 684   |
|                                                |                  | Gm_Cytoch_P450_2        | <i>G. max</i>        | 4          | 2,00 e-85  | 311   |
|                                                | Mt_Cytoch_P450_2 | <i>M. truncatula</i>    | 10                   | 8,00 e-97  | 350        |       |
| Detoxification Enzyme                          | At2g31570        | Gm_Detox_Enz_1          | <i>G. max</i>        | 14         | 4,00 e-43  | 169   |
|                                                |                  | Mt_Detox_Enz_1          | <i>M. truncatula</i> | 17         | 9,00 e-40  | 157   |
|                                                | At2g29450        | Gm_Detox_Enz_2          | <i>G. max</i>        | 19         | 4,00 e-51  | 196   |
|                                                |                  | Mt_Detox_Enz_2          | <i>M. truncatula</i> | 19         | 2,00 e-50  | 194   |

|                                        |           |                     |                      |    |            |      |
|----------------------------------------|-----------|---------------------|----------------------|----|------------|------|
|                                        | At5g44070 | Gm_Detox_Enz_3      | <i>G. max</i>        | 6  | 4,00 e-107 | 374  |
|                                        |           | Mt_Detox_Enz_3      | <i>M. truncatula</i> | 2  | 1,00 e-95  | 346  |
| DNA Nucleus                            | At2g18050 | Gm_DNA_Nuc_1        | <i>G. max</i>        | 5  | 3,00 e-11  | 63.2 |
|                                        |           | Mt_DNA_Nuc_1        | <i>M. truncatula</i> | 8  | 1,00 e-11  | 65.1 |
| DREB/ERF<br>Transcription<br>Factor    | At1g22190 | Gm_DREB_ERF_TF_1    | <i>G. max</i>        | 19 | 2,00 e-41  | 164  |
|                                        |           | Mt_DREB_ERF_TF_1    | <i>M. truncatula</i> | 18 | 2,00 e-37  | 152  |
|                                        | At4g17500 | Gm_DREB_ERF_TF_2    | <i>G. max</i>        | 19 | 6,00 e-33  | 136  |
|                                        |           | Mt_DREB_ERF_TF_2    | <i>M. truncatula</i> | 19 | 2,00 e-52  | 202  |
| Ethylene<br>Biosynthesis               | At5g43450 | Gm_Ethyl_Bios_1     | <i>G. max</i>        | 7  | 1,00 e-112 | 402  |
|                                        |           | Mt_Ethyl_Bios_1     | <i>M. truncatula</i> | 19 | 4,00 e-106 | 380  |
|                                        | At1g17020 | Gm_Ethyl_Bios_2     | <i>G. max</i>        | 8  | 5,00 e-61  | 230  |
|                                        |           | Mt_Ethyl_Bios_2     | <i>M. truncatula</i> | 16 | 7,00 e-101 | 363  |
| Fatty Acid<br>Metabolism               | At1g73480 | Gm_Fatty_Acid_Met_1 | <i>G. max</i>        | 14 | 6,00 e-96  | 347  |
|                                        |           | Mt_Fatty_Acid_Met_1 | <i>M. truncatula</i> | 18 | 5,00 e-26  | 115  |
|                                        | At4g09760 | Gm_Fatty_Acid_Met_2 | <i>G. max</i>        | 8  | 3,00 e-94  | 340  |
|                                        |           | Mt_Fatty_Acid_Met_2 | <i>M. truncatula</i> | 6  | 3,00 e-124 | 441  |
|                                        | At1g73920 | Gm_Fatty_Acid_Met_3 | <i>G. max</i>        | 3  | 2,00 e-58  | 222  |
|                                        |           | Mt_Fatty_Acid_Met_3 | <i>M. truncatula</i> | 1  | 3,00 e-134 | 446  |
|                                        | At1g07720 | Gm_Fatty_Acid_Met_4 | <i>G. max</i>        | 19 | 2,00 e-92  | 335  |
|                                        |           | Mt_Fatty_Acid_Met_4 | <i>M. truncatula</i> | 19 | 8,00 e-168 | 586  |
| Ferritin                               | At5g01600 | Gm_Ferritin_1       | <i>G. max</i>        | 6  | 1,00 e-85  | 311  |
|                                        |           | Mt_Ferritin_1       | <i>M. truncatula</i> | 13 | 1,00 e-87  | 318  |
| Heat Shock Protein                     | At3g46230 | Gm_HSF_1            | <i>G. max</i>        | 19 | 2,00 e-51  | 197  |
|                                        |           | Mt_HSF_1            | <i>M. truncatula</i> | 19 | 1,00 e-51  | 198  |
|                                        | At1g16030 | Gm_HSF_2            | <i>G. max</i>        | 8  | 0.0        | 996  |
|                                        |           | Mt_HSF_2            | <i>M. truncatula</i> | 5  | 0.0        | 994  |
| Homeodomain<br>Transcription<br>Factor | At2g35940 | Gm_Homeodom_TF_1    | <i>G. max</i>        | 19 | 8,00 e-88  | 320  |
|                                        |           | Mt_Homeodom_TF_1    | <i>M. truncatula</i> | 19 | 4,00 e-116 | 415  |
| LEA Protein                            | At4g02380 | Gm_LEA_1            | <i>G. max</i>        | 6  | 6,00 e-09  | 55.5 |
|                                        |           | Mt_LEA_1            | <i>M. truncatula</i> | 4  | 2,00 e-07  | 50.4 |
| Membrane Protein                       | At5g54170 | Gm_Memb_Prot_1      | <i>G. max</i>        | 7  | 1,00 e-116 | 415  |
|                                        |           | Mt_Memb_Prot_1      | <i>M. truncatula</i> | 6  | 3,00 e-113 | 332  |
|                                        | At1g30360 | Gm_Memb_Prot_2      | <i>G. max</i>        | 8  | 6,00 e-44  | 174  |
|                                        |           | Mt_Memb_Prot_2      | <i>M. truncatula</i> | 17 | 0.0        | 855  |
| MYB<br>Transcription<br>Factor         | At1g01060 | Gm_MYB_TF_1         | <i>G. max</i>        | 18 | 8,00 e-57  | 217  |
|                                        |           | Mt_MYB_TF_1         | <i>M. truncatula</i> | 11 | 4,00 e-25  | 112  |
| NAC Transcription<br>Factor            | At5g63790 | Gm_NAC_TF_1         | <i>G. max</i>        | 10 | 1,00 e-89  | 325  |
|                                        |           | Mt_NAC_TF_1         | <i>M. truncatula</i> | 11 | 4,00 e-91  | 330  |
|                                        | At4g27410 | Gm_NAC_TF_2         | <i>G. max</i>        | 9  | 2,00 e-95  | 344  |
|                                        |           | Mt_NAC_TF_2         | <i>M. truncatula</i> | 10 | 2,00 e-94  | 341  |
| Osmoprotectant                         | At2g47180 | Gm_Osmoprot_1       | <i>G. max</i>        | 4  | 2,00 e-142 | 500  |
|                                        |           | Mt_Osmoprot_1       | <i>M. truncatula</i> | 4  | 3,00 e-157 | 550  |
|                                        | At1g09350 | Gm_Osmoprot_2       | <i>G. max</i>        | -  | 2,00 e-11  | 65.5 |
|                                        | At1g60470 | Gm_Osmoprot_3       | <i>G. max</i>        | -  | 5,00 e-09  | 57.8 |
|                                        |           | Mt_Osmoprot_2       | <i>M. truncatula</i> | -  | 9,00 e-16  | 80.9 |

|                                       |           |                      |                      |    |            |      |
|---------------------------------------|-----------|----------------------|----------------------|----|------------|------|
|                                       | At3g57520 | Gm_Osmoprot_4        | <i>G. max</i>        | 8  | 9,00 e-155 | 543  |
|                                       |           | Mt_Osmoprot_3        | <i>M. truncatula</i> | 9  | 0.0        | 865  |
|                                       | At5g20830 | Gm_Osmoprot_5        | <i>G. max</i>        | 10 | 0.0        | 1410 |
|                                       |           | Mt_Osmoprot_4        | <i>M. truncatula</i> | 17 | 0.0        | 1384 |
| Photosynthesis                        | At4g15530 | Gm_Photosynt_1       | <i>G. max</i>        | 7  | 6,00 e-143 | 504  |
|                                       |           | Mt_Photosynt_1       | <i>M. truncatula</i> | 5  | 0.0        | 1102 |
|                                       | At3g55430 | Gm_Plant_Defen_1     | <i>G. max</i>        | 19 | 6,00 e-86  | 313  |
|                                       |           | Mt_Plant_Defen_1     | <i>M. truncatula</i> | 19 | 2,00 e-133 | 472  |
| Plant Defense                         | At4g13580 | Gm_Plant_Defen_2     | <i>G. max</i>        | 19 | 4,00 e-42  | 166  |
|                                       |           | Mt_Plant_Defen_2     | <i>M. truncatula</i> | 19 | 1,00 e-67  | 252  |
|                                       | At2g40000 | Gm_Plant_Defen_3     | <i>G. max</i>        | -  | 1,00 e-53  | 206  |
|                                       |           | Mt_Plant_Defen_3     | <i>M. truncatula</i> | 5  | 9,00 e-130 | 459  |
|                                       | At5g06860 | Gm_Plant_Defen_4     | <i>G. max</i>        | 18 | 6,00 e-109 | 389  |
|                                       |           | Mt_Plant_Defen_4     | <i>M. truncatula</i> | 19 | 2,00 e-100 | 362  |
| Protein degradation                   | At1g47128 | Gm_Prot_Degrad_1     | <i>G. max</i>        | 19 | 0.0        | 634  |
|                                       |           | Mt_Prot_Degrad_1     | <i>M. truncatula</i> | 19 | 7,00 e-161 | 330  |
|                                       | At2g31880 | Gm_Prot_Kinase_1     | <i>G. max</i>        | 15 | 7,00 e-166 | 309  |
| Protein Kinase                        |           | Mt_Prot_Kinase_1     | <i>M. truncatula</i> | 14 | 9,00 e-114 | 407  |
|                                       | At5g25110 | Gm_Prot_Kinase_2     | <i>G. max</i>        | 16 | 5,00 e-146 | 242  |
|                                       |           | Mt_Prot_Kinase_2     | <i>M. truncatula</i> | 13 | 3,00 e-143 | 504  |
| Protein Phosphatase                   | At4g26080 | Gm_Prot_Phosphat_1   | <i>G. max</i>        | 13 | 3,00 e-108 | 387  |
|                                       |           | Mt_Prot_Phosphat_1   | <i>M. truncatula</i> | 13 | 7,00 e-98  | 353  |
|                                       | At3g11410 | Gm_Prot_Phosphat_1   | <i>G. max</i>        | 9  | 1,00 e-50  | 196  |
|                                       |           | Mt_Prot_Phosphat_1   | <i>M. truncatula</i> | 11 | 2,00 e-91  | 332  |
| Reproductive Development              | At5g56750 | Gm_Reprod_Develop_1  | <i>G. max</i>        | 14 | 3,00 e-162 | 566  |
|                                       |           | Mt_Reprod_Develop_1  | <i>M. truncatula</i> | 4  | 5,00 e-74  | 274  |
|                                       | At3g22370 | Gm_Reprod_Develop_2  | <i>G. max</i>        | 1  | 3,00 e-142 | 500  |
|                                       |           | Mt_Reprod_Develop_2  | <i>M. truncatula</i> | 13 | 9,00 e-143 | 502  |
| Secondary Metabolism                  | At2g38240 | Gm_Second_Metabol_1  | <i>G. max</i>        | 13 | 3,00 e-67  | 251  |
|                                       |           | Mt_Second_Metabol_1  | <i>M. truncatula</i> | 7  | 1,00 e-125 | 445  |
| Senescence-Related                    | At5g13170 | Gm_Senesc_Relat_1    | <i>G. max</i>        | 19 | 4,00 e-69  | 257  |
|                                       |           | Mt_Senesc_Relat_1    | <i>M. truncatula</i> | 19 | 1,00 e-74  | 275  |
| Signalling                            | At5g33380 | Gm_Siganlling_1      | <i>G. max</i>        | 7  | 8,00 e-57  | 215  |
|                                       |           | Mt_Siganlling_1      | <i>M. truncatula</i> | 5  | 2,00 e-43  | 171  |
| Transport Protein Ion Channel Carrier | At1g58360 | Gm_Transp_Prot_Ion_1 | <i>G. max</i>        | 19 | 4,00 e-116 | 414  |
|                                       |           | Mt_Transp_Prot_Ion_1 | <i>M. truncatula</i> | 19 | 1,00 e-180 | 629  |
|                                       | At1g08930 | Gm_Transp_Prot_Ion_2 | <i>G. max</i>        | 19 | 3,00 e-81  | 298  |
|                                       | At5g20380 | Gm_Transp_Prot_Ion_3 | <i>G. max</i>        | 5  | 5,00 e-93  | 337  |
|                                       |           | Mt_Transp_Prot_Ion_2 | <i>M. truncatula</i> | 12 | 1,00 e-86  | 317  |
|                                       | At2g22500 | Gm_Transp_Prot_Ion_4 | <i>G. max</i>        | 13 | 2,00 e-117 | 417  |
|                                       |           | Mt_Transp_Prot_Ion_3 | <i>M. truncatula</i> | 10 | 1,00 e-112 | 402  |
| Unknown Protein                       | At5g22290 | Gm_Unknown_1         | <i>G. max</i>        | 7  | 6,00 e-42  | 167  |
|                                       |           | Mt_Unknown_1         | <i>M. truncatula</i> | 11 | 4,00 e-62  | 234  |
|                                       | At1g11210 | Mt_Unknown_2         | <i>M. truncatula</i> | -  | 8,00 e-11  | 64.3 |
|                                       | At1g15430 | Gm_Unknown_2         | <i>G. max</i>        | 3  | 5,00 e-28  | 120  |

|            |               |                      |    |            |      |
|------------|---------------|----------------------|----|------------|------|
|            | Mt_Unknown_3  | <i>M. truncatula</i> | 7  | 1,00 e-31  | 132  |
| At1g55280  | Gm_Unknown_3  | <i>G. max</i>        | -  | 9,00 e-34  | 140  |
|            | Mt_Unknown_4  | <i>M. truncatula</i> | -  | 6,00 e-39  | 157  |
| At1g63720  | Gm_Unknown_4  | <i>G. max</i>        | 5  | 2,00 e-20  | 95.5 |
|            | Mt_Unknown_5  | <i>M. truncatula</i> | 1  | 2,00 e-28  | 122  |
| At1g69890  | Gm_Unknown_5  | <i>G. max</i>        | 1  | 2,00 e-76  | 281  |
|            | Mt_Unknown_6  | <i>M. truncatula</i> | 7  | 2,00 e-66  | 248  |
| At1g76600  | Gm_Unknown_6  | <i>G. max</i>        | 1  | 4,00 e-16  | 80.5 |
|            | Mt_Unknown_7  | <i>M. truncatula</i> | 2  | 1,00 e-14  | 75.9 |
| At2g26560  | Gm_Unknown_7  | <i>G. max</i>        | 4  | 3,00 e-124 | 441  |
|            | Mt_Unknown_8  | <i>M. truncatula</i> | 19 | 3,00 e-147 | 518  |
| At2g32240  | Gm_Unknown_8  | <i>G. max</i>        | 1  | 2,00 e-39  | 160  |
|            | Mt_Unknown_9  | <i>M. truncatula</i> | 2  | 2,00 e-67  | 254  |
| At2g38820  | Gm_Unknown_9  | <i>G. max</i>        | 14 | 2,00 e-56  | 214  |
|            | Mt_Unknown_10 | <i>M. truncatula</i> | 19 | 3,00 e-81  | 298  |
| At2g41190  | Gm_Unknown_10 | <i>G. max</i>        | 15 | 1,00 e-61  | 233  |
|            | Mt_Unknown_11 | <i>M. truncatula</i> | 11 | 6,00 e-50  | 154  |
| At3g17800  | Gm_Unknown_11 | <i>G. max</i>        | 12 | 6,00 e-79  | 290  |
|            | Mt_Unknown_12 | <i>M. truncatula</i> | 9  | 1,00 e-87  | 320  |
| At4g21570  | Gm_Unknown_12 | <i>G. max</i>        | 13 | 3,00 e-106 | 380  |
|            | Mt_Unknown_13 | <i>M. truncatula</i> | 4  | 4,00 e-58  | 202  |
| At4g25670  | Gm_Unknown_13 | <i>G. max</i>        | 3  | 5,00 e-29  | 123  |
|            | Mt_Unknown_14 | <i>M. truncatula</i> | 1  | 1,00 e-25  | 112  |
| At4g27520  | Gm_Unknown_14 | <i>G. max</i>        | 7  | 7,00 e-20  | 94.0 |
|            | Mt_Unknown_15 | <i>M. truncatula</i> | 12 | 3,00 e-30  | 129  |
| At4g30650  | Gm_Unknown_15 | <i>G. max</i>        | 6  | 2,00 e-13  | 70.1 |
|            | Mt_Unknown_16 | <i>M. truncatula</i> | 6  | 4,00 e-18  | 86.3 |
| At4g38060  | Gm_Unknown_16 | <i>G. max</i>        | -  | 9,00 e-18  | 84.7 |
|            | Mt_Unknown_17 | <i>M. truncatula</i> | 3  | 2,00 e-15  | 77.8 |
| At5g02020  | Gm_Unknown_17 | <i>G. max</i>        | 1  | 8,00 e-10  | 58.2 |
|            | Mt_Unknown_18 | <i>M. truncatula</i> | 3  | 2,00 e-07  | 50.8 |
| At5g42050  | Gm_Unknown_18 | <i>G. max</i>        | 8  | 8,00 e-66  | 246  |
|            | Mt_Unknown_19 | <i>M. truncatula</i> | 17 | 2,00 e-70  | 262  |
| At5g50100  | Gm_Unknown_19 | <i>G. max</i>        | 1  | 3,00 e-60  | 197  |
|            | Mt_Unknown_20 | <i>M. truncatula</i> | 1  | 2,00 e-46  | 181  |
| At3g61060  | Gm_Unknown_20 | <i>G. max</i>        | 19 | 5,00 e-102 | 366  |
|            | Mt_Unknown_21 | <i>M. truncatula</i> | 19 | 2,00 e-101 | 365  |
| At4g37390  | Gm_Unknown_21 | <i>G. max</i>        | 5  | 0.0        | 510  |
|            | Mt_Unknown_22 | <i>M. truncatula</i> | 12 | 0.0        | 754  |
| At5g630160 | Gm_Unknown_22 | <i>G. max</i>        | 3  | 3,00 e-20  | 95.1 |
|            | Mt_Unknown_23 | <i>M. truncatula</i> | 4  | 5,00 e-32  | 134  |
| At5g43260  | Mt_Unknown_24 | <i>M. truncatula</i> | 1  | 3,00 e-36  | 146  |
| At1g76650  | Gm_Unknown_23 | <i>G. max</i>        | 1  | 4,00 e-11  | 63.5 |
|            | Mt_Unknown_25 | <i>M. truncatula</i> | 5  | 6,00 e-25  | 109  |
| At1g29395  | Mt_Unknown_26 | <i>M. truncatula</i> | -  | 2,00 e-40  | 161  |

|                                  |           |                 |                      |    |            |      |
|----------------------------------|-----------|-----------------|----------------------|----|------------|------|
|                                  | At2g40140 | Gm_Unknown_24   | <i>G. max</i>        | 19 | 1,00 e-161 | 565  |
|                                  |           | Mt_Unknown_27   | <i>M. truncatula</i> | 19 | 5,00 e-153 | 537  |
|                                  | At4g36040 | Gm_Unknown_25   | <i>G. max</i>        | 20 | 1,00 e-28  | 121  |
|                                  |           | Mt_Unknown_28   | <i>M. truncatula</i> | 19 | 2,00 e-26  | 114  |
|                                  | At4g33050 | Gm_Unknown_26   | <i>G. max</i>        | 9  | 1,00 e-59  | 225  |
|                                  |           | Mt_Unknown_29   | <i>M. truncatula</i> | 14 | 7,00 e-74  | 273  |
|                                  | At5g09440 | Gm_Unknown_27   | <i>G. max</i>        | 18 | 3,00 e-87  | 317  |
|                                  |           | Mt_Unknown_30   | <i>M. truncatula</i> | 19 | 2,00 e-79  | 291  |
|                                  | At1g19180 | Gm_Unknown_28   | <i>G. max</i>        | 9  | 9,00 e-38  | 152  |
|                                  |           | Mt_Unknown_31   | <i>M. truncatula</i> | 14 | 3,00 e-23  | 105  |
|                                  | At1g17380 | Gm_Unknown_29   | <i>G. max</i>        | 1  | 4,00 e-11  | 64.3 |
|                                  |           | Mt_Unknown_32   | <i>M. truncatula</i> | 1  | 7,00 e-14  | 74.3 |
|                                  | At1g02660 | Gm_Unknown_30   | <i>G. max</i>        | 4  | 4,00 e-59  | 224  |
|                                  |           | Mt_Unknown_33   | <i>M. truncatula</i> | 5  | 7,00 e-168 | 587  |
|                                  | At2g21620 | Gm_Unknown_31   | <i>G. max</i>        | 2  | 6,00 e-66  | 245  |
|                                  |           | Mt_Unknown_34   | <i>M. truncatula</i> | 1  | 2,00 e-65  | 244  |
|                                  | At1g27760 | Gm_Unknown_32   | <i>G. max</i>        | 7  | 2,00 e-126 | 448  |
|                                  |           | Mt_Unknown_35   | <i>M. truncatula</i> | 1  | 6,00 e-107 | 384  |
|                                  | At1g63010 | Gm_Unknown_33   | <i>G. max</i>        | 4  | 3,00 e-77  | 285  |
|                                  |           | Mt_Unknown_36   | <i>M. truncatula</i> | 3  | 8,00 e-89  | 324  |
|                                  | At2g41640 | Gm_Unknown_34   | <i>G. max</i>        | 1  | 1,00 e-56  | 216  |
|                                  |           | Mt_Unknown_37   | <i>M. truncatula</i> | 2  | 9,00 e-160 | 559  |
|                                  | At1g11360 | Gm_Unknown_35   | <i>G. max</i>        | 14 | 5,00 e-67  | 249  |
|                                  |           | Mt_Unknown_38   | <i>M. truncatula</i> | 19 | 1,00 e-59  | 225  |
| Water Channel Protein            | At2g37180 | Gm_Water_Chan_1 | <i>G. max</i>        | 19 | 2,00 e-116 | 414  |
|                                  |           | Mt_Water_Chan_1 | <i>M. truncatula</i> | 19 | 3,00 e-115 | 410  |
| WRKY Transcription Factor        | At2g30250 | Gm_WRKY_TF_1    | <i>G. max</i>        | 10 | 4,00 e-65  | 244  |
|                                  |           | Mt_WRKY_TF_1    | <i>M. truncatula</i> | 15 | 3,00 e-62  | 235  |
|                                  | At5g13080 | Gm_WRKY_TF_2    | <i>G. max</i>        | 12 | 9,00 e-43  | 167  |
|                                  |           | Mt_WRKY_TF_2    | <i>M. truncatula</i> | 8  | 1,00 e-40  | 161  |
|                                  | At2g19580 | Gm_ZF_TF_1      | <i>G. max</i>        | 7  | 9,00 e-31  | 129  |
| Zinc Finger Transcription Factor |           | Mt_ZF_TF_1      | <i>M. truncatula</i> | 15 | 4,00 e-32  | 134  |
|                                  | At5g59820 | Gm_ZF_TF_2      | <i>G. max</i>        | 11 | 1,00 e-24  | 107  |
|                                  | At2g31380 | Gm_ZF_TF_3      | <i>G. max</i>        | 17 | 7,00 e-68  | 252  |
|                                  |           | Mt_ZF_TF_2      | <i>M. truncatula</i> | 16 | 4,00 e-67  | 250  |
